# Supplementary material
Source: bioRxiv or medRxiv preprint supplement (https://www.biorxiv.org/highwire/filestream/125689/field_highwire_adjunct_files/3/416701-3.pdf)

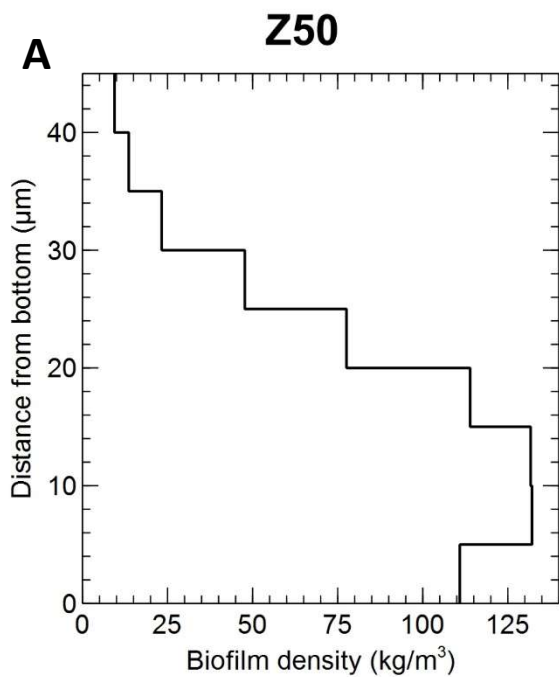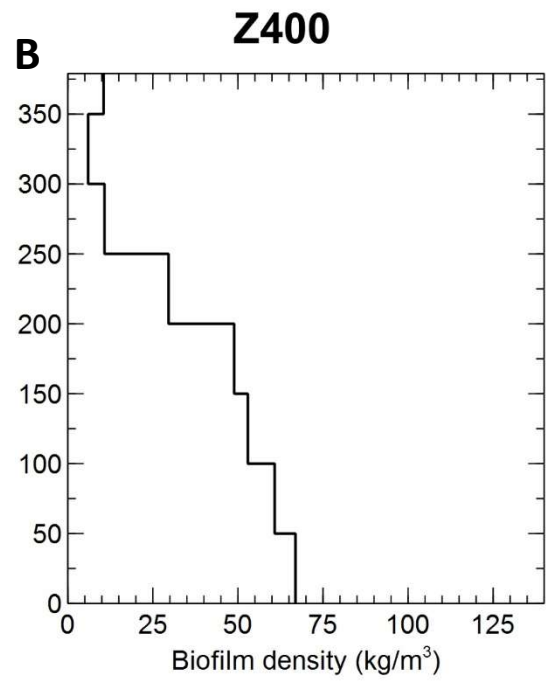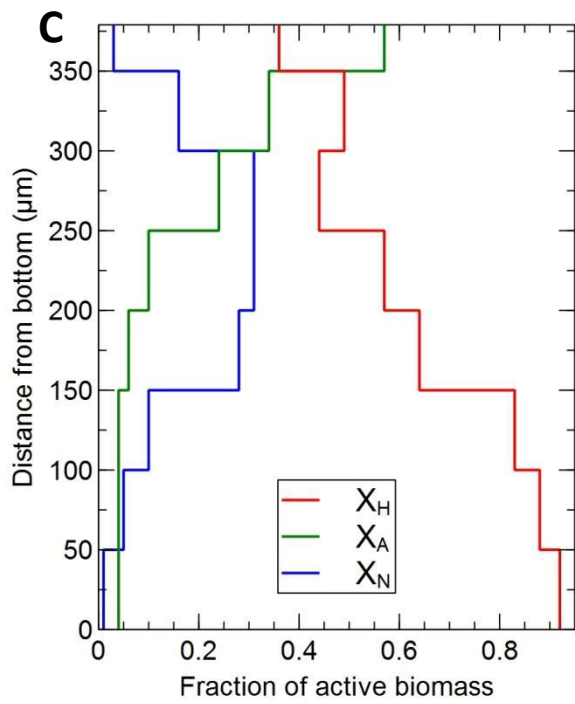

Supplement: Supplementary file [file 416701-3.pdf]
